# Supplementary material for: Thrombopoietin induces production of nucleated thrombocytes from liver cells in Xenopus laevis
Source: PubMed Central journal article supplement (PMC4685256; doi:10.1038/srep18519), 2015-12-21
Supplement: srep18519-s1.pdf [file srep18519-s1.pdf]

# Supplemental Information

## Thrombopoietin induces production of nucleated thrombocytes from liver cells in *Xenopus laevis*

Yuta Tanizaki<sup>1</sup>, Megumi Ichisugi<sup>2</sup>, Miyako Shimoji-Obuchi<sup>3</sup>, Takako Ishida-Iwata<sup>3</sup>, Ayaka Mogi-Tahara<sup>2</sup>, Mizue Ishikawa-Meguro<sup>2</sup>, and Takashi Kato<sup>1,2,3</sup>

<sup>1</sup>Department of Biology, School of Education, Waseda University, 2-2 Wakamatsu, Shinjuku, Tokyo, 162-8480, Japan, <sup>2</sup>Integrative Bioscience and Biomedical Engineering, Graduate School of Advanced Science and Engineering, Waseda University, 2-2 Wakamatsu, Shinjuku, Tokyo 162-8480, Japan; <sup>3</sup>Education and Integrated Arts and Sciences, Waseda University; 2-2 Wakamatsu, Shinjuku, Tokyo 162-8480, Japan

\*Author for correspondence: Takashi Kato

Integrative Bioscience and Biomedical Engineering, Graduate School of Advanced Science and Engineering, Waseda University  
2-2 Wakamatsu, Shinjuku, Tokyo 162-8480, Japan  
Phone: +81 (3) 5369-7309, Fax: +81 (3) 3355-0316, Email: tkato@waseda.jp

# Supplementary Figure 1

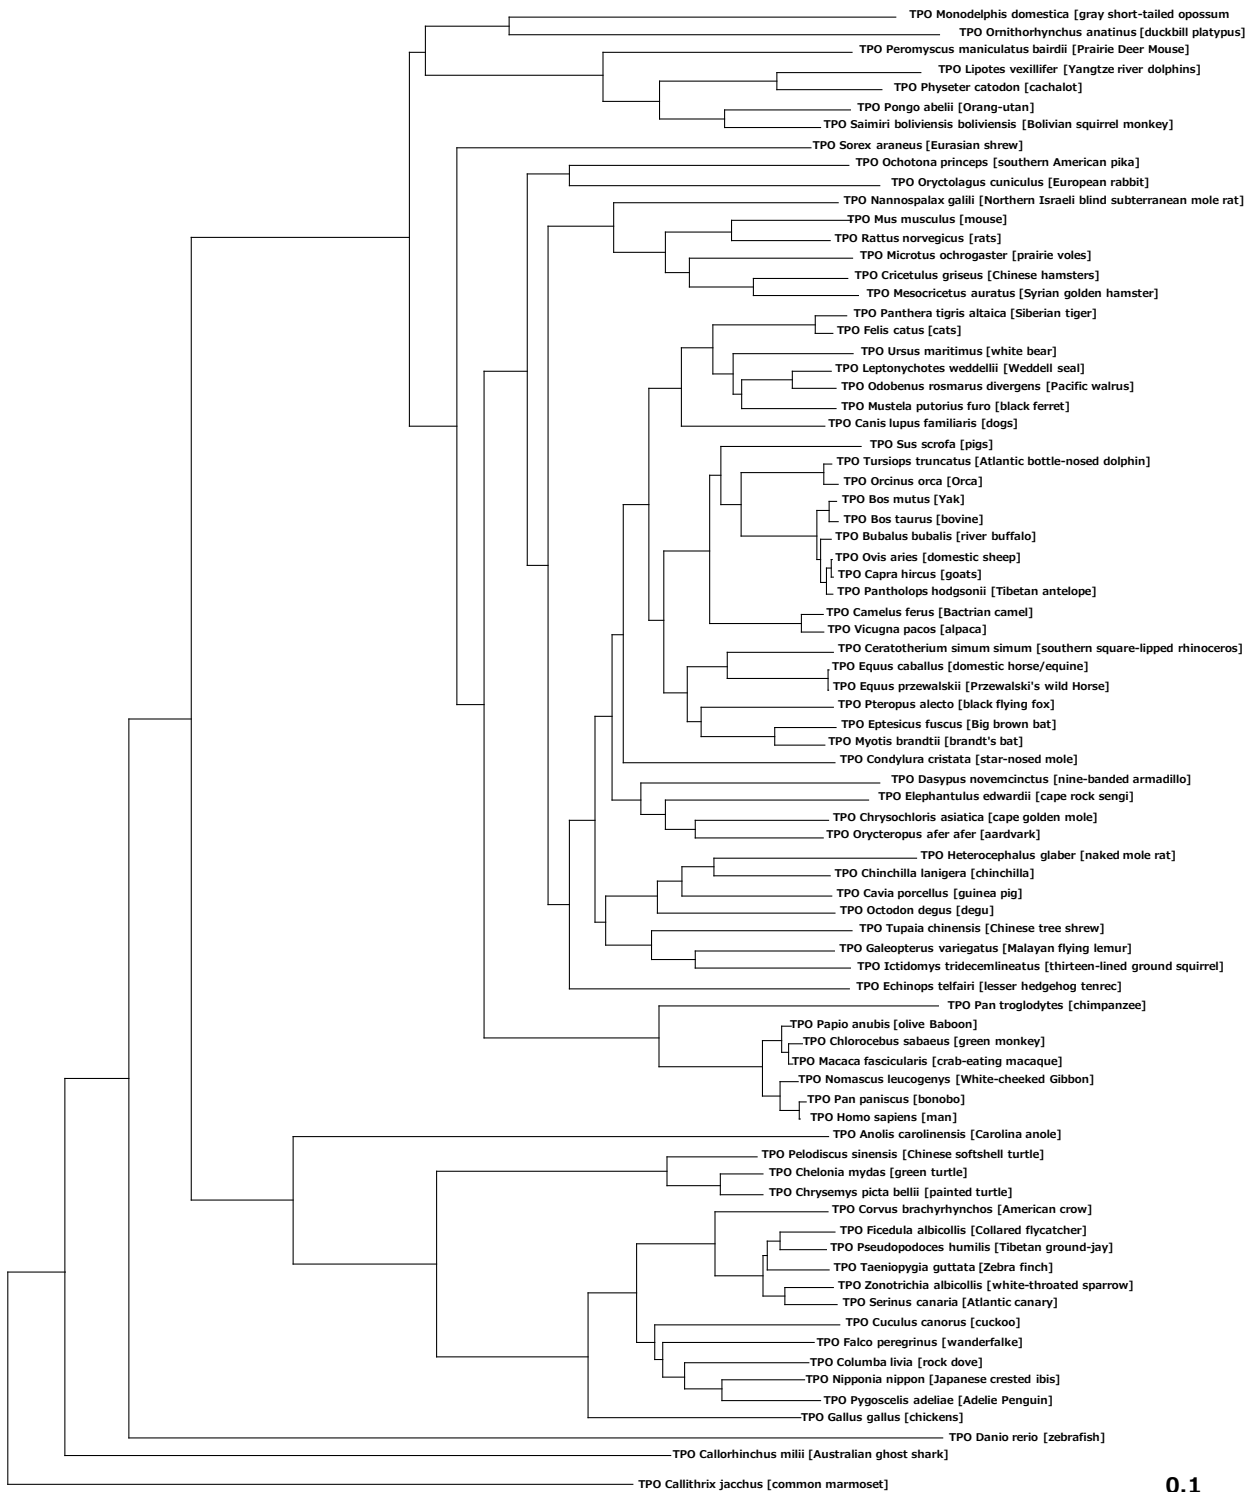

0.1

**Supplementary Figure 1. Phylogeny of putative thrombopoietin.** Phylogeny analyses were performed by use of Clustal Omega and Clustal Phylogeny for proteins, provide through the analysis tool web services from the EMBL-EBI (<http://www.ebi.ac.uk/Tools/msa/clustalo/>). The deduced sequences of TPO were aligned with the program Clustal Omega and a tree was calculated using TreeViewX software<sup>1-3</sup>.

1. Sievers, F. *et al.* Fast, scalable generation of high-quality protein multiple sequence alignments using Clustal Omega. *Molecular Systems Biology* **7**, (2011).
2. Goujon, M. *et al.* A new bioinformatics analysis tools framework at EMBL-EBI. *Nucleic Acids Res.* **38**, (2010).
3. McWilliam, H. *et al.* Analysis Tool Web Services from the EMBL-EBI. *Nucleic Acids Res.* **41**, (2013).

# Supplementary Figure 2

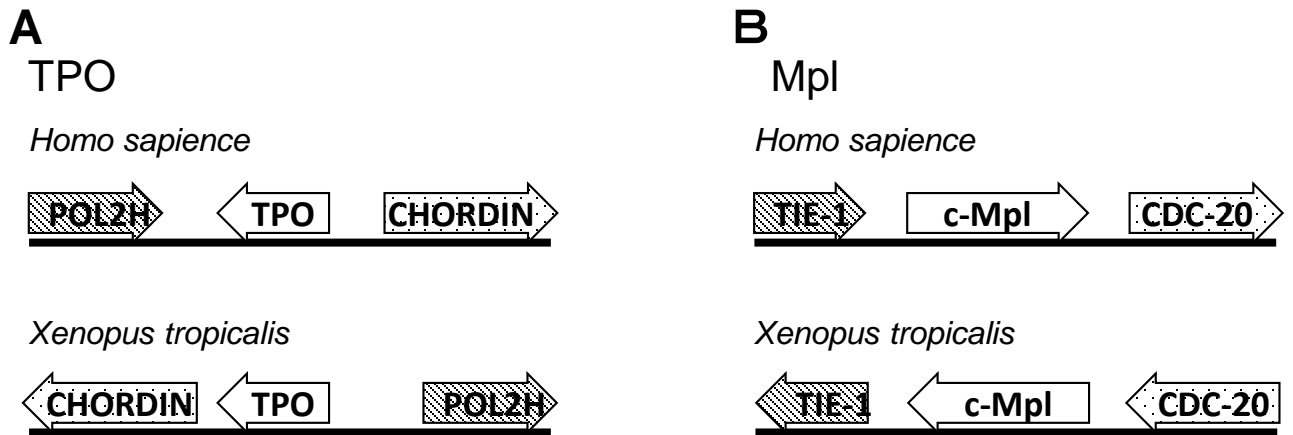

**Supplementary Figure 2. Conserved synteny and homology between the *X. tropicalis* and human TPO and Mpl loci.** (A) RNA polymerase II H (POL2H) and Chordin, mapped in the hTPO locus, were identified by NCBI Homologene or BLAST search in the *X. tropicalis* genome database. The synteny of POL2H, CHORDIN, and TPO at the human, mouse, chicken, and *X. tropicalis* TPO loci was conserved, although their order and direction of transcription has been shuffled (B) TIE-1 and CDC-20 in *x*/Mpl were identified by NCBI Homologene or BLAST in the *X. tropicalis* genome database. The synteny of TIE-1, CDC-20, and Mpl at the human, mouse, chicken, and *X. tropicalis* Mpl loci was also conserved, although their order and direction of transcription has been shuffled.

# Supplementary Figure 3

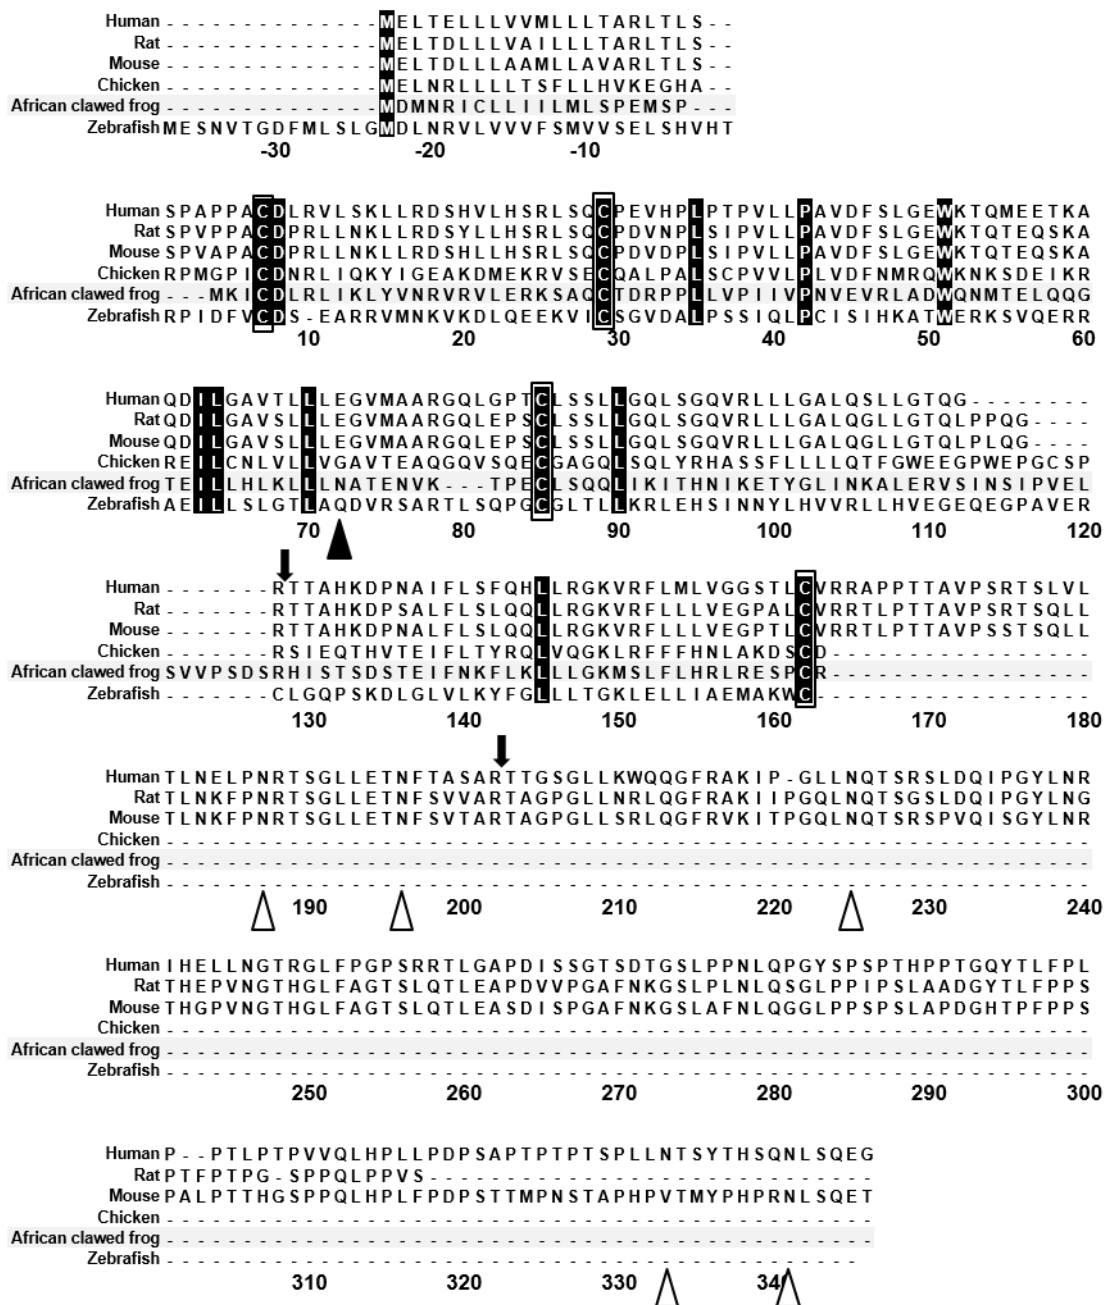

**Supplementary Figure 3. Homology of TPOs from various vertebrate species.** Amino acid sequence homology of mature TPOs from human, rat, mouse, chicken, *X. laevis*, and zebrafish. Numbers represent positions from the N-terminal end of mature  $\alpha$ TPO. The predicted signal peptide is shown at the top and indicated in lowercase letters. Identical amino acid residues are shaded black. Cysteine residues that form possible disulfide bridges in  $\alpha$ TPO are boxed. Positions of potential N-linked carbohydrate on  $\alpha$ TPO and hTPO are indicated by solid and open arrowheads, respectively. Potential sites for N-glycosylation are conserved in human, rat, and murine TPOs, whereas zebrafish, chicken, and *X. laevis* TPOs lack a C-terminal domain. The thrombin cleavage site in hTPO is indicated by an arrow. The tertiary structure of human TPO has been solved as an antiparallel four-helix bundle fold. TPO sequences were obtained from GenBank (accession numbers: human, AAI30323; rat, BAA06906; mouse, AAA40436; chicken, AAT45554; zebrafish, NP\_001137225).

# Supplementary Figure 4

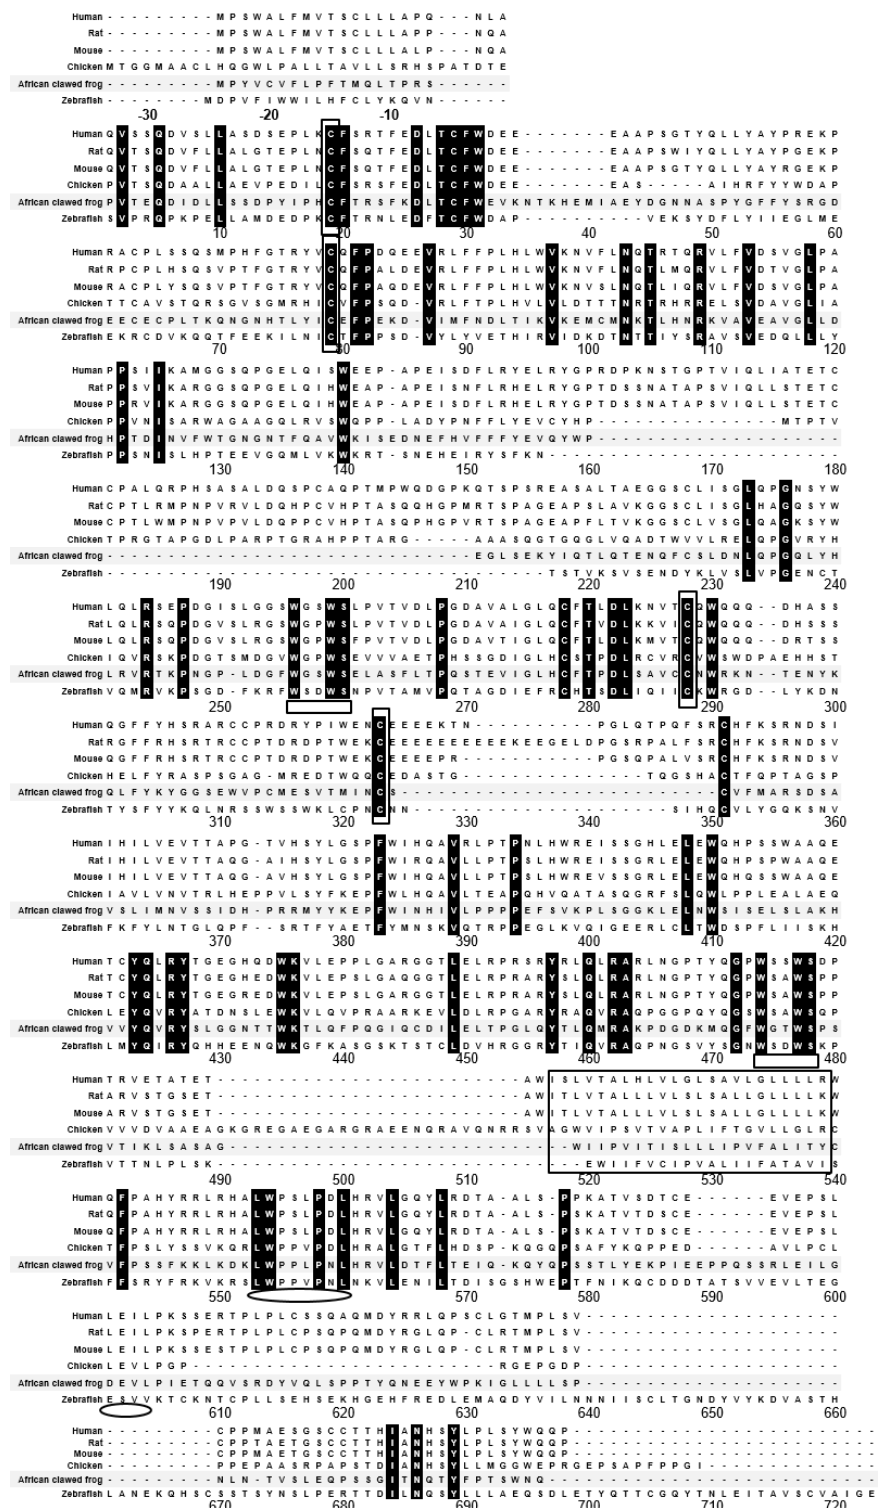

**Supplementary Figure 4. Homology of Mpls from various vertebrate species.** Amino acid sequence homology of mature Mpls from human, rat, mouse, chicken, zebrafish, and *X. laevis*. Numbers indicate positions from the N terminus of the mature x/TPO. The predicted signal peptide is shown at the top and indicated by lowercase letters. Identical amino acid residues are shaded black. Cysteine residues that form possible disulfide bridges in x/Mpl are boxed. Putative transmembrane domains are underlined. White boxes indicate tryptophan-serine-x-tryptophan-serine (WSXWS) motifs and the Box1 and Box2 regions, thought to be important for mitogenic signaling. Mpl sequences were obtained from GenBank (accession numbers: human, NP\_005364; mouse, NP\_001116421; chicken, NP\_001001782; zebrafish, NP\_001003858). The x/TPO and x/Mpl sequences have been submitted to DDBJ/EMBL/GenBank with accession numbers AB256538 and AB272077.

# Supplementary Figure 5

**A**

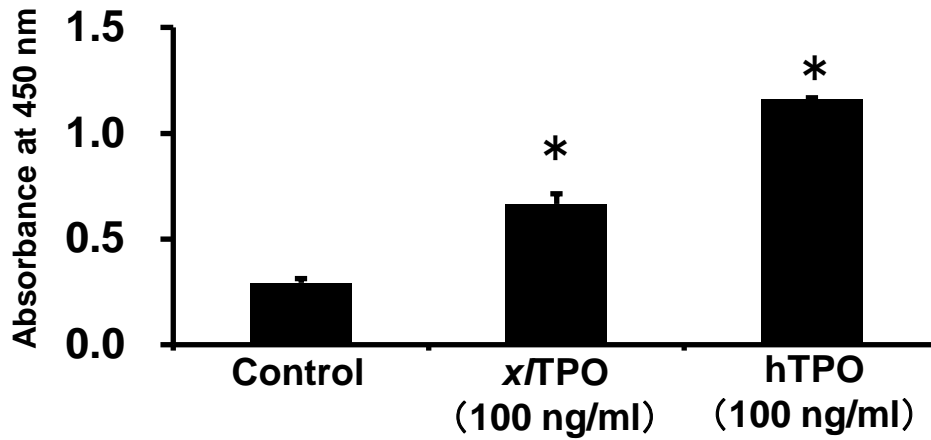

**B**

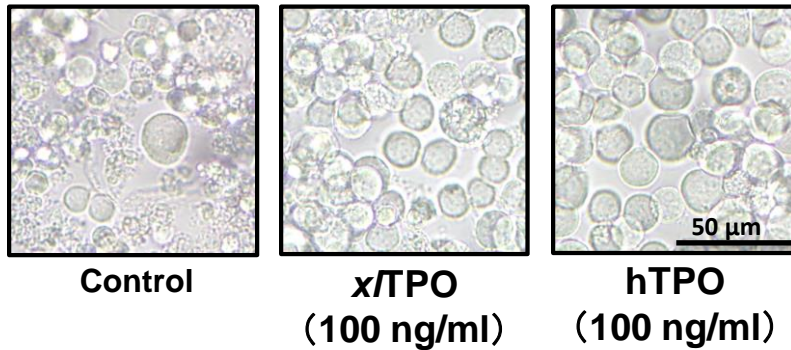

**C**

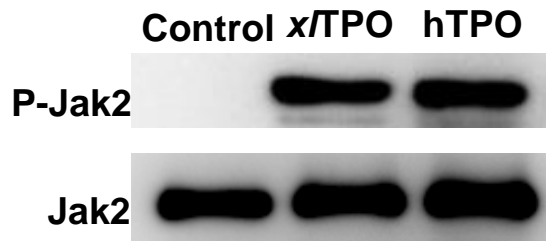

**Supplementary Figure 5. Proliferation of UT-7/TPO cells after x/TPO stimulation.** (A) MTS assay of UT-7/TPO cells. UT-7/TPO cells were stimulated with x/TPO or hTPO for 72 h in 96-well plates and analyzed by MTS assay. Controls were the UT-7/TPO cells cultured in the absence of TPO for 72 h. \* $P < 0.05$  vs. the control. (B) Cell morphology of UT-7/TPO cells. UT-7/TPO cells were stimulated with x/TPO or hTPO for 72 h. (C) JAK2 phosphorylation. UT-7/TPO cells were cultured overnight in the absence of serum and growth factor in IMDM. Cells were stimulated with x/TPO or hTPO for 5 min and phosphorylated JAK2 was measured by western blotting.

# Supplementary Figure 6

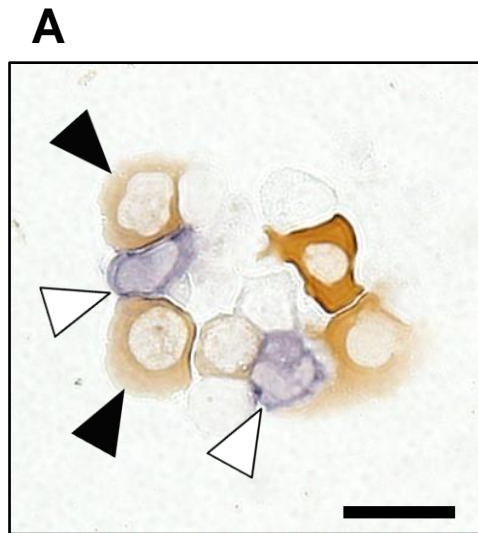

T-E mixed Colony

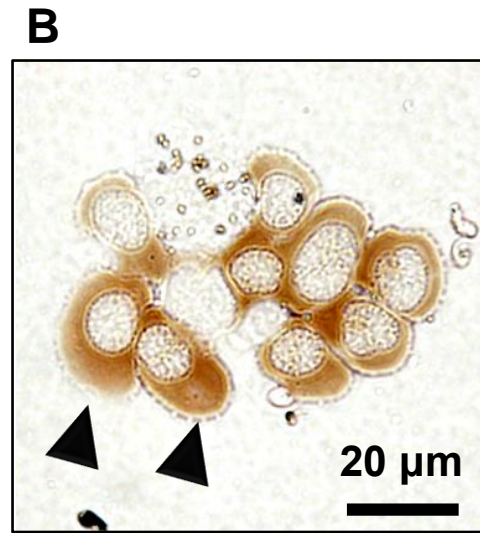

Erythroid Colony

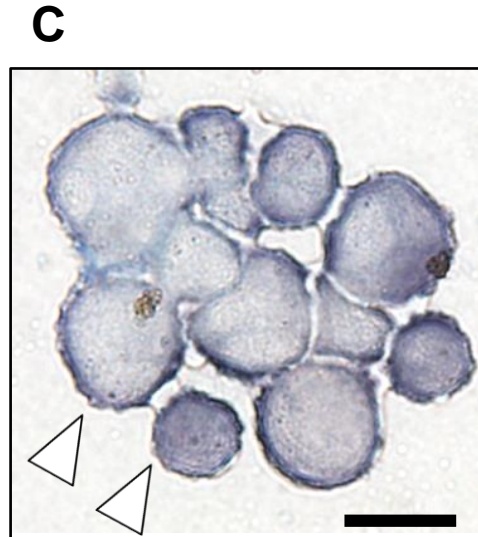

Thrombocytic Colony

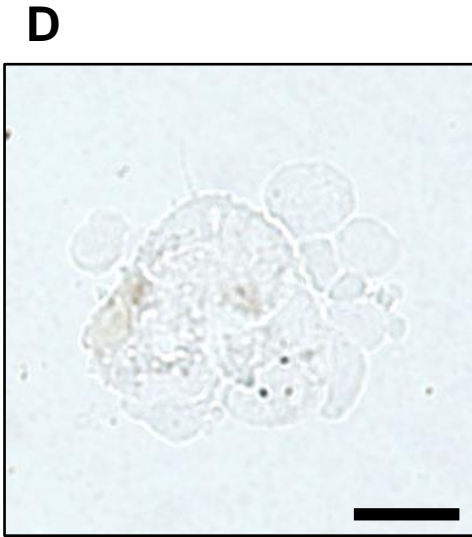

Other Colony

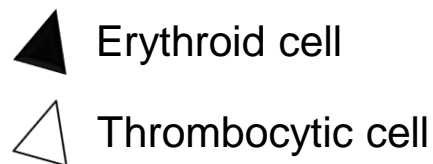

**Supplementary Figure 6. Colonies derived from hepatic cells in the presence of anemic serum.** Hepatic cells from anemic frogs were cultured in semi-solid medium in the presence of anemic serum. After four days, the cells were collected and cytocentrifuged smears were prepared using a cytospin cytocentrifuge. Colonies were immunostained for T12 and counterstained with *o*-dianisidine. (A) Colony of T12- and *o*-dianisidine positive cells. (B and C) Colony composed of only *o*-dianisidine or T12-positive cells. (D) Colony composed of non-hemoglobinized cells.

# Supplementary Figure 7

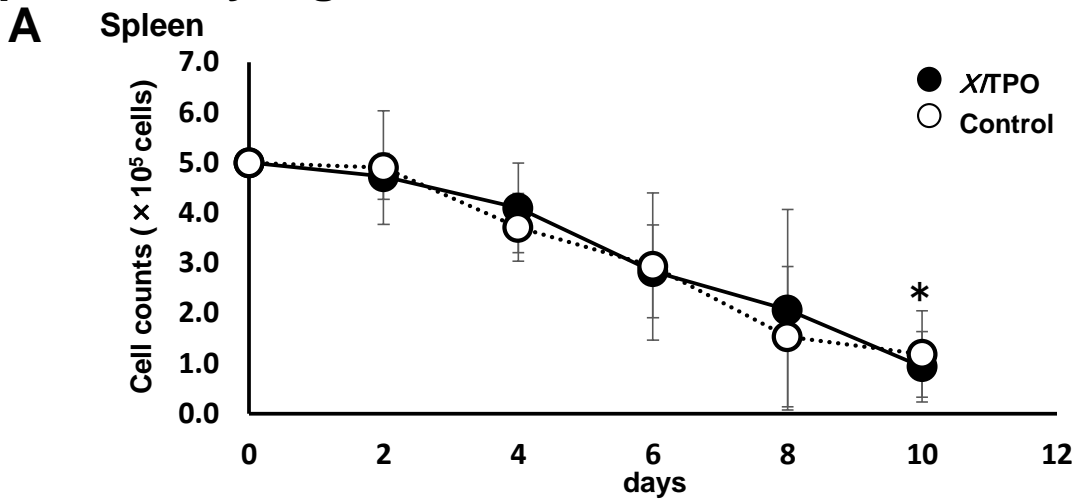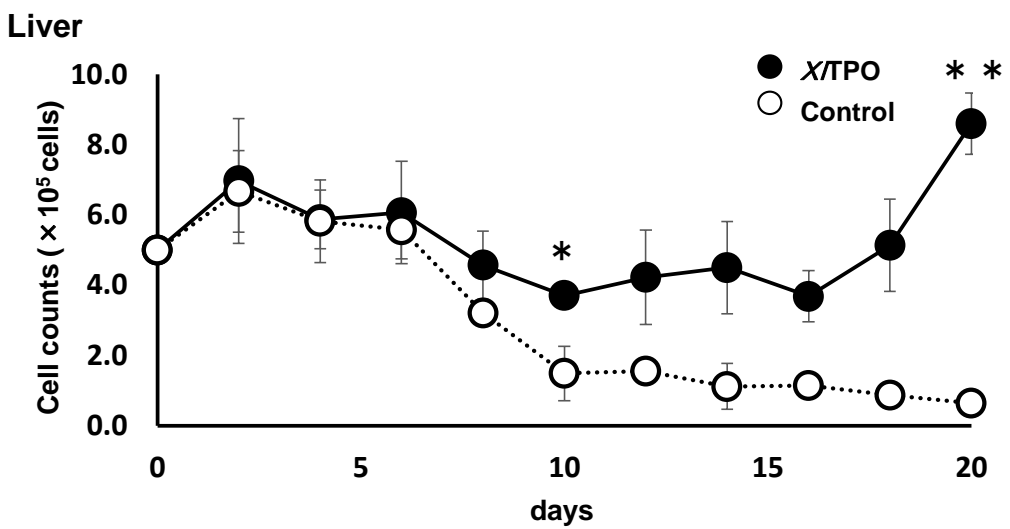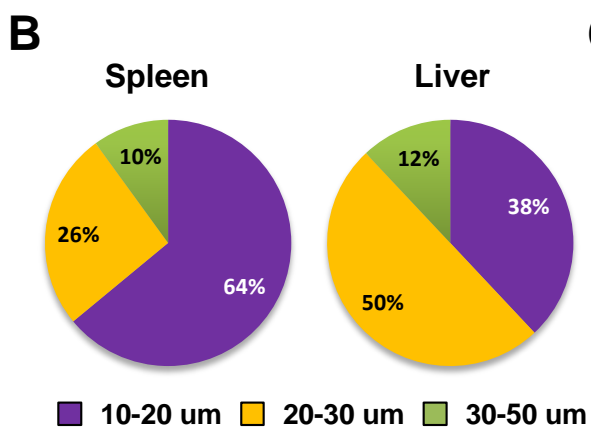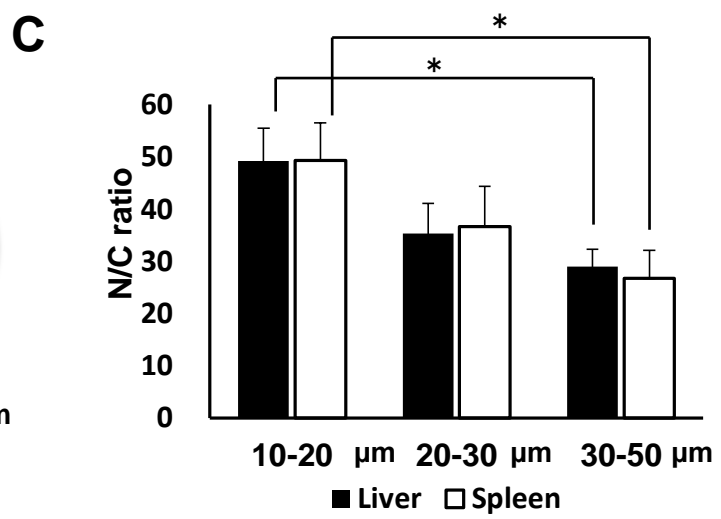

**Supplementary Figure 7. Viability of splenic or hepatic cells after x/TPO stimulation.** (A) Whole cells were counted during liquid culture of spleen or liver cells in the presence of x/TPO. Open squares represent the control. Black squares represent x/TPO-stimulated cells. \*P < 0.05 vs. day 0; \*\* P < 0.05 vs. day 10. The data represent mean  $\pm$  SD (N = 3). (B) Cellular distribution was investigated on cytospin preparations from hepatic and splenic cells after culturing with x/TPO for 8 days. (C) Morphological features of hepatic and splenic cells at 8 days of culture such as N/C ratio was calculated using images of cells by image-J software. Black bars indicates hepatic x/TPO-stimulated cells. White bars indicates splenic x/TPO-stimulated cells. Analysis was performed three times (N=3) . Results are presented as mean SD. \*P < 0.05



# Supplementary Figure 8

A

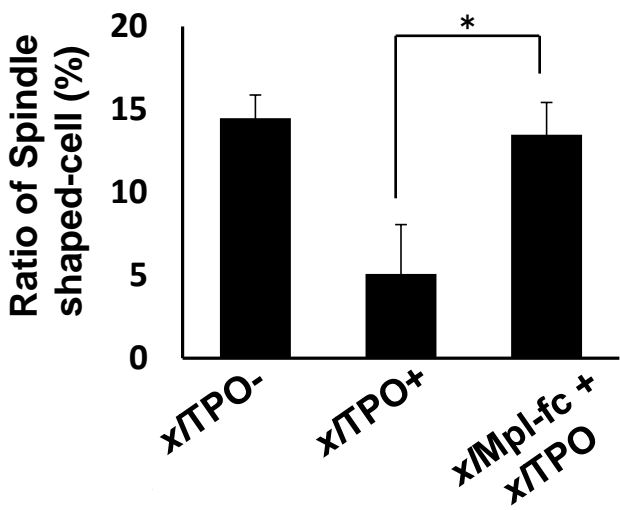

B

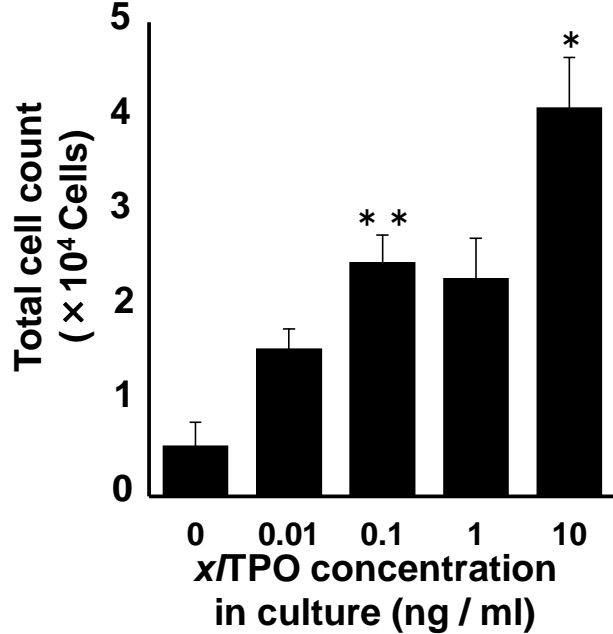

**Supplementary Figure 7. x/TPO activity in the MKs and peripheral thrombocytes.** (A) MKs were enriched by density gradient method and cultured with x/TPO in the presence or absence of x/Mpl-Fc fusion protein for 4 days. Graphs represent means + SD, n = 3. \*P < 0.05 (B) Peripheral thrombocytes were enriched by density gradient method and cultured in the presence of increasing concentrations of x/TPO for 8 days. Analysis was performed three times (N=3) . Results are presented as mean SD. \*P < 0.05 vs 0.1 ng/mL x/TPO ; \*\* P < 0.05 vs 0 ng/mL x/TPO .

# Supplementary Figure 9

## A Full uncropped gel image from Fig. 1E

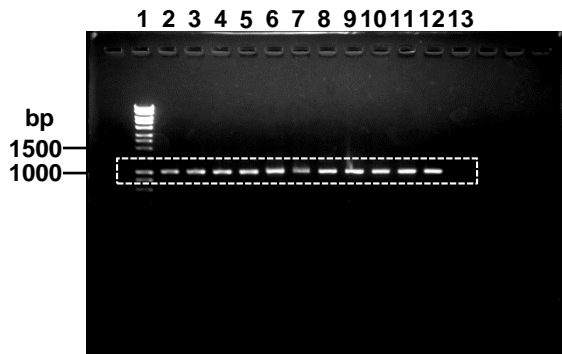

**GAPDH**

|           |               |
|-----------|---------------|
| 1: Marker | 7: Liver      |
| 2: Brain  | 8: Spleen     |
| 3: Lung   | 9: Kidney     |
| 4: Muscle | 10: Stomach   |
| 5: Heart  | 11: Intestine |
| 6: PB     | 12: Testis    |
|           | 13: Water     |

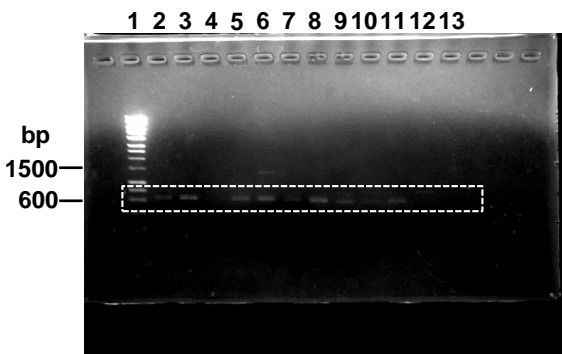

**Mpl**

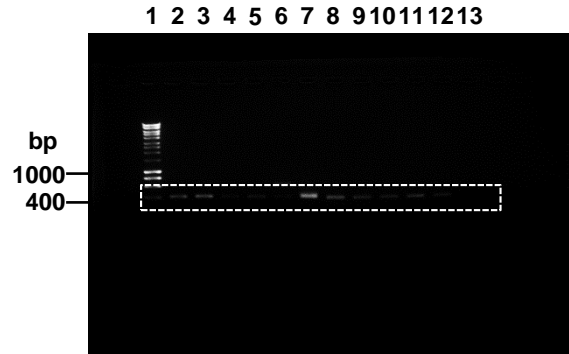

**TPO**

## B Full uncropped gel image from Fig. 6D

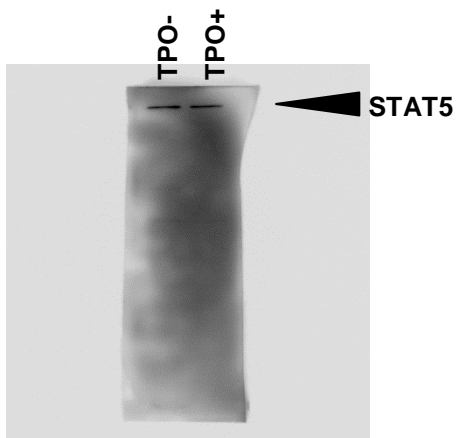

**STAT5**

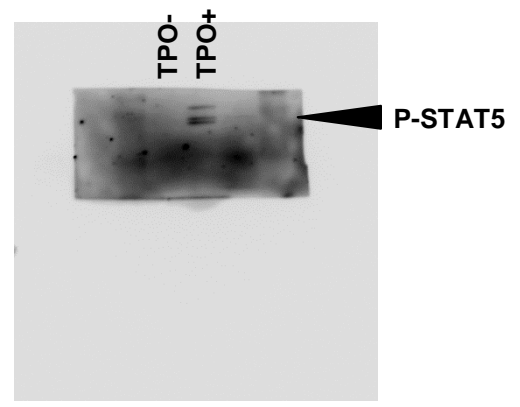

**P-STAT5**
